# Supplementary material for: When Is a Two-Stage Surgical Procedure Indicated in the Treatment of Pseudotumors of the Hip? A Retrospective Study of 21 Cases and a Review of the Literature
Source: Preprints.org preprint supplement (doi:10.20944/preprints202401.1287.v1), 2024-01-17
Supplement: Supplementary file 1 [file supplementary]

Table S1. Published literature on management of pseudotumors of the hip.

| Authors                     | Study                  | N° patients | Age(mean)        | Time to revision                                          | Comorbidity                                            | Gender       | Byopsy<br>pre | Tribology       | Symphoms                                                     | Surgery                        | Complications                                       | Outcomes                                                               |
|-----------------------------|------------------------|-------------|------------------|-----------------------------------------------------------|--------------------------------------------------------|--------------|---------------|-----------------|--------------------------------------------------------------|--------------------------------|-----------------------------------------------------|------------------------------------------------------------------------|
| Pandit et al. (2008)        | Retrospective study    | 17          | 53 (35 to 73)    | 12                                                        | N.R                                                    | F            |               | MoM             | Pain dislocation<br>nerve palsy                              | One stage                      | no                                                  | Symptoms<br>improved                                                   |
| Maurer et al. (2011)        | Case report            | 1           | 38               | 1                                                         | N.R                                                    | F            |               | MoM             | N.R                                                          | One stage (CoC)                | N.R                                                 | Complete<br>Resolution<br>symptomsafte<br>r 20 months                  |
| Parfitt et al.(2012)        | Case report            | 1           | 64               | 1.4                                                       | N.R                                                    | M            |               | MoM             | N.R                                                          | One stage (MoP)                | N.R                                                 | Good<br>functional                                                     |
| Algarni et al.(2012)        | Case report            | 1           | 54               | 5                                                         | N.R                                                    | F            |               | MoM             | N.R                                                          | One stage (CoC)                | N.R                                                 | Complete<br>Resolution<br>symptomsafte<br>r 6 months,<br>no recurrence |
| Memon et al.(2013)          | Case report            | 1           | 54               | 5                                                         | N.R                                                    | F            |               | MoM             | N.R                                                          | One stage (CoC)                | N.R                                                 | Good<br>function                                                       |
| Kawakita et al.(2013)       | Case report            | 1           | 69               | 1.2                                                       | N.R                                                    | F            |               | MoM             | N.R                                                          | One stage (CoC)                | N.R                                                 | Good<br>function after<br>3 months                                     |
| Sulaiman et al. (2013)      | Prospective study      | 20          | 61               | N.R                                                       | N.R                                                    | 12F<br>8 M   |               | 13 MoM<br>3 MoP | N.R                                                          | 5 patients revision            | no                                                  | instability<br>Femoral nerve<br>palsy slowly<br>resolves               |
| Sutphen et al. (2015)       | Retrospective study    | 70          | N.R              | N.R                                                       | N.R                                                    | N.R          |               | N.R             | 31 Symptomatic<br>39 asymptomatic                            | N.R                            | N.R                                                 | N.R                                                                    |
| Bischof et al.              | N.R                    | 40          | N.R              | N.R                                                       | N.R                                                    | N.R          |               | N.R             | 11 Symptomatic<br>29 asymptomatic                            | N.R                            | N.R                                                 | N.R                                                                    |
| Nawabi et al.               | N.R                    | 55          | N.R              | N.R                                                       | N.R                                                    | N.R          |               | N.R             | 40 Symptomatic<br>15 asymptomatic                            | N.R                            | no                                                  | N.R                                                                    |
| Dong Fu et al (2015)        | Case report and review | 2           | 60 (1)<br>47 (2) | 20 (1)<br>28(2)                                           | Ankylosing<br>spondylitis<br>Ankylosing<br>spondylitis | M<br>M       |               | MoP<br>MoP      | yes                                                          | Swelling pain<br>Swelling pain | Emipelvic amputation<br>One stage (THA<br>revision) | no                                                                     |
| Zahi et al. (2015)          | Retrospective study    | 8           | N.R              | 31.9(range 18-45)                                         | Hemophilia A(7)<br>B(1)                                | M            |               | N.R             | N.R                                                          | N.R                            | Pseutotumor excision<br>and fixation                | 3 infection                                                            |
| Abdel-Hamid et<br>al.(2015) | Case report            | 1           | 75               | 6                                                         | N.R                                                    | F            |               | MoM             | N.R                                                          | One stage (CoP)                | N.R<br>-                                            | Significant<br>improvement<br>of swelling<br>after 9<br>months         |
| Hasegwa et al (2016)        | Retrospective study    | 62          | 64               | 45.7 months<br>symptomatic<br>49.7 months<br>asymptomstic | N.R                                                    | 49 F<br>13 M |               | MoM             | 16 Symptomatic<br>(larger<br>pseudotumor)<br>46 asymptomatic | N.R<br>-                       | N.R                                                 | N.R                                                                    |
| Campbell et al. (2016)      | Case report            | 1           | 57               | 9                                                         | N.R                                                    | F            |               | CoC             | pain                                                         | One stage                      | no                                                  | asymtomatic                                                            |
| Cottino et al. (2017)       | Case report            | 1           | 72               | 15                                                        | N.R<br>N.R                                             | F            |               | MoM             | Abdominal mass,<br>pain                                      | Two stage                      | no                                                  | Pain free                                                              |
| Blau et al. (2017)          | Case report            | 1           | 69               | 7                                                         | N.R.                                                   | F            |               | CoM             | Hip pain 8<br>elevated serum<br>cobalt                       | N.R                            | no                                                  | No recurrence<br>decreased level<br>cobalt<br>chromium                 |

N.R.: not reported, M: male; F: female; MoM: Metal on metal; MoP: Metal on Polyethylene; CoC: Ceramic on Ceramic; CoM: Ceramic on Metal; THA: total Hip Arthroplasty

| Authors                     | Study                                             | N° patients | Age(mean)           | Time to revision  | Comorbidity                                         | Gender       | Tribology                         | Biopsy pre | Symptoms                                                                                               | Surgery                                                                             | Complications                                  | outcomes                                                                                                             |
|-----------------------------|---------------------------------------------------|-------------|---------------------|-------------------|-----------------------------------------------------|--------------|-----------------------------------|------------|--------------------------------------------------------------------------------------------------------|-------------------------------------------------------------------------------------|------------------------------------------------|----------------------------------------------------------------------------------------------------------------------|
| Konan et al. (2017)         | Comparative study, ultrasound in pseudotumor      | 71          | 56(34-38)           | N.R               | N.R                                                 | 24 F<br>47 M | MoM                               |            | 15 asymptomatic<br>8 symptomatic                                                                       | 8 patients revision THA symptomatic pseudotumor                                     | N.R                                            | N.R                                                                                                                  |
| Smeekees et al. (2018)      | Comparison study of three grading system with MRI |             | N.R                 | N.R               | N.R                                                 |              | MoM                               |            | 54 symptomatic<br>52 asymptomatic                                                                      | N.R                                                                                 | N.R                                            | N.R                                                                                                                  |
| Gudda et al. (2018)         | Case report                                       | 1           | 50                  | 8                 | N.R                                                 | F            | CoM                               |            | pain                                                                                                   | One stage                                                                           | no                                             | Good result<br>HHS pre op 58<br>post op 87                                                                           |
| Persson et al. (2018)       | Prospective study                                 | 13          | 66                  | 6,7 (2-16)        | osteoarthritis                                      | 9 F<br>4 M   | MoP                               | yes        | Pain swelling, mass                                                                                    | One stage<br>Excision<br>pseudotumor and revision the nodular femoral head tocerami | N.R                                            | N.R                                                                                                                  |
| Caleb W. Grote et al (2018) | Case presentation and literature review           | 1           | 58                  | 4                 | F                                                   | MoM          | N.R                               |            | Compression external iliac vein                                                                        | One stage (revision THA)                                                            | no                                             | Complete Resolution symptoms after 4 years                                                                           |
| Hart et al.                 | Case series                                       | 34          | N.R                 | 34                | N.R                                                 | N.R          | N.R                               |            | 17 Symptomatic<br>17 asymptomatic                                                                      | N.R                                                                                 | N.R                                            | N.R                                                                                                                  |
| Sagoo et al. (2020)         | Case report                                       | 1           | 53                  | 11                | HIV                                                 | M            | MoM                               |            | Severe Chronic abdominal pain<br>symptomatic psoas fluid collection<br>communicate with MoM prosthesis | One stage                                                                           | No                                             | Minimal pain                                                                                                         |
| Massovaghi et al. (2021)    | Case report                                       | 1           | 67                  | 7                 | osteoarthritis                                      | M            | CoC                               |            | Aseptic loosening pain                                                                                 | One stage                                                                           | no                                             | HHS pre 45<br>post 67<br>Good functional                                                                             |
| Filer et al. (2021)         | Case report                                       | 1           | 62                  | 14                | N.R                                                 | F            | MoM                               |            | Haemorrhagic pseudotumor                                                                               | Revision Hip ( Cer-Pol) no excision pseudotumor                                     | no                                             | Regression of the<br>pseudotumor,<br>Resolution of symptoms<br>no pain, paresthesia and neuralgia have been resolved |
| Rodriguez et al (2022)      | Case report                                       | 1           | 71                  | 13                | N.R                                                 | M            | Cer-Cer                           |            | Femoral nerve compression                                                                              | One stage                                                                           | no                                             |                                                                                                                      |
| Huang et al. (2022)         | Case report                                       | 1           | 73                  | 7                 | N.R                                                 | F            | Cer-Cer                           |            | pain                                                                                                   | One stage                                                                           | dislocation                                    | HHS 90<br>asymptomatic                                                                                               |
| Present study               | Retrospective study e revision of literature      |             | 21 69 (range 50-82) | 9,86 (range 1-20) | DM, IPA, stroke, arthritis , obesity, dysplasia, .. | 13 F,<br>8 M | 11 MoP<br>7 MoM<br>2 CoC<br>1 CoP | yes        | Swelling, pain                                                                                         | <b>10 one stage</b><br><b>10 two stage</b><br><b>1 excision only</b>                | 5 major ( 2 death) 3 deep infection<br>3 minor | <b>HHS pre 35</b><br><b>HHS post 75</b>                                                                              |

N.R.: not reported, M: male; F: female; MoM: Metal on metal; MoP: Metal on Polyethylene; CoC: Ceramic on Ceramic; CoM: Ceramic on Metal; THA: total Hip Arthroplasty, HHS: Harry Hip Scores, DM: Diabetes Mellitus; IPA: Hypertension
