# Supplementary material for: When Is a Two-Stage Surgical Procedure Indicated in the Treatment of Pseudotumors of the Hip? A Retrospective Study of 21 Cases and a Review of the Literature
Source: Preprints.org preprint supplement (doi:10.20944/preprints202401.1287.v1), 2024-01-17
Supplement: Supplementary file 1 [file supplementary]

**Figure S1.** Example of two- stage surgical procedure. Preoperative X-ray (a) and CT scan (b) showing pseudotumor. First stage of the procedure (c). 3D CT scan performed after the first surgery and 3D printed model of the acetabular (d). Custom-made acetabular (e). Second stage of the procedure (f,g). Post operative X-rays (h,i).
